# Supplementary material for: PFASUM: a substitution matrix from Pfam structural alignments
Source: PubMed Central journal article supplement (PMC5460430; doi:10.1186/s12859-017-1703-z), 2017-06-05
Supplement: 12859_2017_1703_MOESM3_ESM.pdf [file 12859_2017_1703_MOESM3_ESM.pdf]

|   | A   | R   | N   | D   | C   | Q   | E   | G   | H   | I   | L   | K   | M   | F   | P   | S   | T   | W   | Y   | V   | B   | Z   | J   | X   |
|---|-----|-----|-----|-----|-----|-----|-----|-----|-----|-----|-----|-----|-----|-----|-----|-----|-----|-----|-----|-----|-----|-----|-----|-----|
| A | 4   |     |     |     |     |     |     |     |     |     |     |     |     |     |     |     |     |     |     |     |     |     |     |     |
| R | -1  | 6   |     |     |     |     |     |     |     |     |     |     |     |     |     |     |     |     |     |     |     |     |     |     |
| N | -1  | 0   | 6   |     |     |     |     |     |     |     |     |     |     |     |     |     |     |     |     |     |     |     |     |     |
| D | -1  | 0   | 2   | 6   |     |     |     |     |     |     |     |     |     |     |     |     |     |     |     |     |     |     |     |     |
| C | 0   | -3  | -2  | -4  | 13  |     |     |     |     |     |     |     |     |     |     |     |     |     |     |     |     |     |     |     |
| Q | 0   | 2   | 1   | 1   | -3  | 5   |     |     |     |     |     |     |     |     |     |     |     |     |     |     |     |     |     |     |
| E | -1  | 1   | 1   | 3   | -4  | 2   | 5   |     |     |     |     |     |     |     |     |     |     |     |     |     |     |     |     |     |
| G | 0   | -2  | 0   | 0   | -2  | -1  | -1  | 7   |     |     |     |     |     |     |     |     |     |     |     |     |     |     |     |     |
| H | -2  | 1   | 1   | 0   | -2  | 1   | 0   | -2  | 9   |     |     |     |     |     |     |     |     |     |     |     |     |     |     |     |
| I | -1  | -3  | -4  | -5  | -1  | -3  | -4  | -4  | -3  | 5   |     |     |     |     |     |     |     |     |     |     |     |     |     |     |
| L | -1  | -3  | -4  | -5  | -1  | -3  | -4  | -4  | -3  | 2   | 4   |     |     |     |     |     |     |     |     |     |     |     |     |     |
| K | -1  | 3   | 1   | 0   | -4  | 2   | 2   | -1  | 0   | -3  | -3  | 5   |     |     |     |     |     |     |     |     |     |     |     |     |
| M | 0   | -2  | -2  | -4  | 0   | -1  | -3  | -3  | -2  | 2   | 2   | -2  | 6   |     |     |     |     |     |     |     |     |     |     |     |
| F | -2  | -3  | -3  | -5  | -1  | -3  | -4  | -4  | -1  | 1   | 2   | -4  | 1   | 7   |     |     |     |     |     |     |     |     |     |     |
| P | -1  | -1  | -1  | 0   | -3  | -1  | -1  | -1  | -1  | -3  | -3  | -1  | -3  | -3  | 9   |     |     |     |     |     |     |     |     |     |
| S | 1   | 0   | 1   | 0   | 0   | 0   | 0   | 0   | 0   | -3  | -3  | 0   | -2  | -3  | 0   | 4   |     |     |     |     |     |     |     |     |
| T | 0   | 0   | 0   | 0   | -1  | 0   | 0   | -1  | -1  | -1  | -2  | 0   | -1  | -2  | -1  | 2   | 4   |     |     |     |     |     |     |     |
| W | -2  | -2  | -3  | -4  | -2  | -3  | -4  | -3  | -1  | -1  | 0   | -3  | 0   | 3   | -3  | -3  | -3  | 13  |     |     |     |     |     |     |
| Y | -2  | -2  | -2  | -3  | -1  | -2  | -3  | -3  | 2   | -1  | 0   | -2  | 0   | 4   | -3  | -2  | -2  | 3   | 8   |     |     |     |     |     |
| V | 0   | -3  | -3  | -4  | 0   | -2  | -3  | -3  | -3  | 3   | 2   | -3  | 1   | 0   | -2  | -2  | 0   | -2  | -1  | 4   |     |     |     |     |
| B | -4  | -3  | 0   | 0   | -6  | -2  | -1  | -3  | -3  | -7  | -7  | -2  | -6  | -7  | -4  | -2  | -3  | -7  | -5  | -7  | 0   |     |     |     |
| Z | -4  | -2  | -2  | -1  | -7  | -1  | -1  | -4  | -3  | -7  | -6  | -1  | -5  | -7  | -4  | -3  | -3  | -6  | -5  | -6  | -5  | -1  |     |     |
| J | -4  | -6  | -7  | -8  | -4  | -6  | -7  | -7  | -6  | -1  | -1  | -6  | -1  | -1  | -6  | -6  | -4  | -4  | -4  | -1  | -10 | -9  | -1  |     |
| X | -13 | -13 | -13 | -14 | -14 | -13 | -13 | -14 | -13 | -13 | -14 | -13 | -13 | -13 | -14 | -13 | -13 | -14 | -14 | -13 | -16 | -16 | -17 | -20 |

Additional figure 3: PFASUM43 matrix ( $H = 0.3354$  bit) constructed from all Pfam seed alignments (version 29.0) with a 43% sequence similarity threshold.
