# Supplementary material for: PFASUM: a substitution matrix from Pfam structural alignments
Source: PubMed Central journal article supplement (PMC5460430; doi:10.1186/s12859-017-1703-z), 2017-06-05
Supplement: 12859_2017_1703_MOESM7_ESM.pdf [file 12859_2017_1703_MOESM7_ESM.pdf]

Additional table 3: Table of Z-score values for the performance comparison of *Standard Search Matrices* with their PFASUM counterparts based on relative entropy. Non-significant Z-scores based on the 95% percentile are highlighted as bold.

| SSEARCH Matrix | PFASUM   | ASTRAL 20 | ASTRAL 40      | ASTRAL 70      |
|----------------|----------|-----------|----------------|----------------|
| BLOSUM50       | PFASUM59 | 122.3182  | 23.8432        | 15.5655        |
| BLOSUM62       | PFASUM78 | 49.6553   | 12.2135        | 18.6066        |
| PAM250         | PFASUM45 | 351.3204  | 222.2383       | 169.4170       |
| VTML160        | PFASUM67 | 12.0249   | <b>0.04165</b> | -8.4868        |
| VTML200        | PFASUM51 | 45.8990   | 12.2529        | <b>-1.1018</b> |
